# Supplementary material for: Structure and function of rhizosphere and root endophyte microbial communities associated with healthy and root rot diseased Panax notoginseng
Source: Research Square preprint supplement (doi:10.21203/rs.3.rs-478704/v1), 2021-05-03
Supplement: Supplementary file 1 [file b64e4736ce4d617ad9b5dabb.xlsx]

## Sheet: Sheet1
Supplementary Table 2. Species composition of rhizosphere soil and root endophyte samples.
Kingdom	Phylum	Class	Order	Family	Genus	Species	Strain	LJTB-1	LJTB-2	LJTB-3	LJTC-1	LJTC-2	LJTC-3	QBTB-1	QBTB-2	QBTB-3	QBTC-1	QBTC-2	QBTC-3
k__Archaea	p__Euryarchaeota	c__Methanobacteria	o__Methanobacteriales	f__Methanobacteriaceae	g__Methanobrevibacter	unclassified	unclassified	0	0	0	0	0	0	0	0	0.06522	0	0	0
k__Bacteria	p__Acidobacteria	c__Acidobacteriia	o__Acidobacteriales	f__Acidobacteriaceae	unclassified	unclassified	unclassified	0	1.17017	0	6.16424	6.57154	0	0.08619	3.54347	1.0053	5.14665	2.35692	0.11548
k__Bacteria	p__Acidobacteria	c__Acidobacteriia	o__Acidobacteriales	f__Acidobacteriaceae	g__Granulicella	s__Granulicella_mallensis	t__GCF_000178955	0	0	0	0	0	0	0	0	0.07034	0	0	0
k__Bacteria	p__Acidobacteria	c__Acidobacteriia	o__Acidobacteriales	f__Acidobacteriaceae	g__Granulicella	unclassified	unclassified	8.88162	7.2418	8.26831	3.14379	2.80155	8.36724	3.23879	6.50956	1.06041	0.97371	3.14466	1.63058
k__Bacteria	p__Acidobacteria	c__Acidobacteriia	o__Acidobacteriales	f__Acidobacteriaceae	g__Terriglobus	unclassified	unclassified	0	0.58439	0.45895	0	0.58061	0	0.74321	1.9615	0.25849	0.69386	1.02794	0.08115
k__Bacteria	p__Acidobacteria	c__Solibacteres	o__Solibacterales	f__Solibacteraceae	g__Candidatus_Solibacter	s__Candidatus_Solibacter_usitatus	t__GCF_000014905	0.05971	1.0969	0.48846	1.1328	0.90248	0.83443	0	0.31629	0	0	0.33392	0
k__Bacteria	p__Actinobacteria	c__Actinobacteria	o__Actinomycetales	f__Catenulisporaceae	g__Catenulispora	s__Catenulispora_acidiphila	t__GCF_000024025	0	0	0	0	0	0	0	0	0	0	0	0.00447
k__Bacteria	p__Actinobacteria	c__Actinobacteria	o__Actinomycetales	f__Geodermatophilaceae	unclassified	unclassified	unclassified	0.30041	2.36615	1.52469	2.28628	2.37522	4.33503	2.93242	2.90703	0	0.3196	1.56002	0
k__Bacteria	p__Actinobacteria	c__Actinobacteria	o__Actinomycetales	f__Microbacteriaceae	g__Leifsonia	unclassified	unclassified	0	0.66489	0.57331	0.47404	0	1.11972	0	1.71492	0.09268	0	0.56728	1.0724
k__Bacteria	p__Actinobacteria	c__Actinobacteria	o__Actinomycetales	f__Micromonosporaceae	g__Actinoplanes	s__Actinoplanes_globisporus	t__GCF_000379645	0	0	0	0	0	0	0.12883	0	0	0	0	0
k__Bacteria	p__Actinobacteria	c__Actinobacteria	o__Actinomycetales	f__Micromonosporaceae	g__Actinoplanes	unclassified	unclassified	1.09921	1.62665	10.1784	4.50142	0	7.18835	27.4936	24.2181	19.6585	8.00783	16.7199	33.4713
k__Bacteria	p__Actinobacteria	c__Actinobacteria	o__Actinomycetales	f__Micromonosporaceae	g__Salinispora	unclassified	unclassified	0	0	0	0	0	0.08845	2.24913	0.87928	7.75998	1.80759	1.40366	11.9208
k__Bacteria	p__Actinobacteria	c__Actinobacteria	o__Actinomycetales	f__Nocardioidaceae	g__Kribbella	unclassified	unclassified	0	0	0	0.1504	0	0	2.65815	1.35613	0.06277	0.37157	0.7754	0.09161
k__Bacteria	p__Actinobacteria	c__Actinobacteria	o__Actinomycetales	f__Pseudonocardiaceae	g__Pseudonocardia	unclassified	unclassified	0	0	0	0.22141	0.47388	2.13973	0.60827	0.39635	0	0.27667	0	0.02812
k__Bacteria	p__Actinobacteria	c__Actinobacteria	o__Actinomycetales	f__Streptosporangiaceae	unclassified	unclassified	unclassified	0	0	0	0	0	0	0.07686	0	0.01689	0	0	0.08679
k__Bacteria	p__Actinobacteria	c__Actinobacteria	o__Actinomycetales	f__Thermomonosporaceae	unclassified	unclassified	unclassified	0	0	0	0	0	0	0	0	0.86263	0.13759	0	0.80892
k__Bacteria	p__Actinobacteria	c__Actinobacteria	o__Bifidobacteriales	f__Bifidobacteriaceae	g__Bifidobacterium	s__Bifidobacterium_animalis	unclassified	0	0	0	0	0	0	0	0	0.11454	0	0	0
k__Bacteria	p__Actinobacteria	c__Actinobacteria	o__Bifidobacteriales	f__Bifidobacteriaceae	g__Bifidobacterium	s__Bifidobacterium_longum	unclassified	0	0	0	0	0	0	0	0	0.02419	0	0	0
k__Bacteria	p__Actinobacteria	c__Actinobacteria	o__Coriobacteriales	f__Coriobacteriaceae	g__Adlercreutzia	s__Adlercreutzia_equolifaciens	t__GCF_000478885	0	0	0	0	0	0	0	0	0.0161	0	0	0
k__Bacteria	p__Actinobacteria	c__Actinobacteria	o__Coriobacteriales	f__Coriobacteriaceae	g__Collinsella	s__Collinsella_aerofaciens	t__GCF_000169035	0	0	0	0	0	0	0	0	0.21254	0	0	0
k__Bacteria	p__Actinobacteria	c__Actinobacteria	o__Solirubrobacterales	unclassified	unclassified	unclassified	unclassified	1.02087	6.04341	4.65434	3.73187	2.34449	4.24105	12.6537	4.95231	0.09364	2.57359	5.4957	0.02473
k__Bacteria	p__Bacteroidetes	c__Bacteroidia	o__Bacteroidales	f__Bacteroidaceae	g__Bacteroides	s__Bacteroides_caccae	unclassified	0	0	0	0	0	0	0	0	0.11098	0	0	0
k__Bacteria	p__Bacteroidetes	c__Bacteroidia	o__Bacteroidales	f__Bacteroidaceae	g__Bacteroides	s__Bacteroides_dorei	unclassified	0	0	0	0	0	0	0	0	0.24962	0	0	0
k__Bacteria	p__Bacteroidetes	c__Bacteroidia	o__Bacteroidales	f__Bacteroidaceae	g__Bacteroides	s__Bacteroides_massiliensis	unclassified	0	0	0	0	0	0	0	0	0.09156	0	0	0
k__Bacteria	p__Bacteroidetes	c__Bacteroidia	o__Bacteroidales	f__Bacteroidaceae	g__Bacteroides	s__Bacteroides_ovatus	unclassified	0	0	0	0	0	0	0	0	0.03227	0	0	0
k__Bacteria	p__Bacteroidetes	c__Bacteroidia	o__Bacteroidales	f__Bacteroidaceae	g__Bacteroides	s__Bacteroides_stercoris	unclassified	0	0	0	0	0	0	0	0	0.02229	0	0	0
k__Bacteria	p__Bacteroidetes	c__Bacteroidia	o__Bacteroidales	f__Bacteroidaceae	g__Bacteroides	s__Bacteroides_uniformis	unclassified	0	0	0	0	0	0	0	0	0.35386	0	0	0.01368
k__Bacteria	p__Bacteroidetes	c__Bacteroidia	o__Bacteroidales	f__Bacteroidaceae	g__Bacteroides	s__Bacteroides_vulgatus	unclassified	0	0	0	0	0	0	0	0	0.06787	0	0	0
k__Bacteria	p__Bacteroidetes	c__Bacteroidia	o__Bacteroidales	f__Bacteroidaceae	g__Bacteroides	s__Bacteroides_xylanisolvens	unclassified	0	0	0	0	0	0	0	0	0.00954	0	0	0
k__Bacteria	p__Bacteroidetes	c__Bacteroidia	o__Bacteroidales	f__Porphyromonadaceae	g__Parabacteroides	s__Parabacteroides_distasonis	unclassified	0	0	0	0	0	0	0	0	0.01139	0	0	0
k__Bacteria	p__Bacteroidetes	c__Bacteroidia	o__Bacteroidales	f__Porphyromonadaceae	g__Parabacteroides	s__Parabacteroides_merdae	unclassified	0	0	0	0	0	0	0	0	0.10213	0	0	0
k__Bacteria	p__Bacteroidetes	c__Bacteroidia	o__Bacteroidales	f__Prevotellaceae	g__Paraprevotella	unclassified	unclassified	0	0	0	0	0	0	0	0	0.0033	0	0	0
k__Bacteria	p__Bacteroidetes	c__Bacteroidia	o__Bacteroidales	f__Prevotellaceae	g__Prevotella	s__Prevotella_copri	t__GCF_000157935	0	0	0	0	0	0	0	0	0.13326	0	0	0
k__Bacteria	p__Bacteroidetes	c__Bacteroidia	o__Bacteroidales	f__Rikenellaceae	g__Alistipes	s__Alistipes_indistinctus	t__GCF_000231275	0	0	0	0	0	0	0	0	0.01106	0	0	0
k__Bacteria	p__Bacteroidetes	c__Bacteroidia	o__Bacteroidales	f__Rikenellaceae	g__Alistipes	s__Alistipes_putredinis	t__GCF_000154465	0	0	0	0	0	0	0	0	0.80866	0	0.08134	0.03724
k__Bacteria	p__Bacteroidetes	c__Cytophagia	o__Cytophagales	f__Cytophagaceae	g__Hymenobacter	unclassified	unclassified	0	0	0	0	0	0	0.18697	0	0	0.29821	0	0
k__Bacteria	p__Bacteroidetes	c__Sphingobacteriia	o__Sphingobacteriales	f__Sphingobacteriaceae	g__Pedobacter	unclassified	unclassified	0	0	0.67878	0	0	0	0	0	0.19473	0.57718	0	0.47094
k__Bacteria	p__Bacteroidetes	c__Sphingobacteriia	o__Sphingobacteriales	f__Sphingobacteriales_noname	g__Niastella	s__Niastella_koreensis	t__GCF_000246855	0.18174	0	0	0.35044	0	0	0.63503	0.23299	0	0.4671	0.66369	0.0168
k__Bacteria	p__Bacteroidetes	c__Sphingobacteriia	o__Sphingobacteriales	f__Sphingobacteriales_noname	g__Segetibacter	s__Segetibacter_koreensis	t__GCF_000374045	0	0	0	0	0	0	0.03861	0	0	0	0	0
k__Bacteria	p__Chloroflexi	c__Ktedonobacteria	o__Ktedonobacterales	f__Ktedonobacteraceae	g__Ktedonobacter	s__Ktedonobacter_racemifer	t__GCF_000178855	0	0	0	0	0	0	0	0.08147	41.7099	0	0	22.4083
k__Bacteria	p__Deinococcus_Thermus	c__Deinococci	o__Deinococcales	f__Deinococcaceae	g__Deinococcus	unclassified	unclassified	0	0	0	0	0.60933	0	0	0	0	0	0	0
k__Bacteria	p__Firmicutes	c__Bacilli	o__Lactobacillales	f__Streptococcaceae	g__Streptococcus	s__Streptococcus_salivarius	unclassified	0	0	0	0	0	0	0	0	0.13506	0	0	0
k__Bacteria	p__Firmicutes	c__Bacilli	o__Lactobacillales	f__Streptococcaceae	g__Streptococcus	s__Streptococcus_thermophilus	unclassified	0	0	0	0	0	0	0	0	0.1295	0	0	0
k__Bacteria	p__Firmicutes	c__Clostridia	o__Clostridiales	f__Clostridiaceae	g__Clostridium	s__Clostridium_beijerinckii	unclassified	0	0	0	0	0	0	0	0	0.07932	0	0	0
k__Bacteria	p__Firmicutes	c__Clostridia	o__Clostridiales	f__Clostridiaceae	g__Clostridium	s__Clostridium_saccharoperbutylacetonicum	unclassified	0	0	0	0	0	0	0	0	0.02811	0	0	0
k__Bacteria	p__Firmicutes	c__Clostridia	o__Clostridiales	f__Clostridiales_Family_XIII_Incertae_Sedis	unclassified	unclassified	unclassified	0	0	0	0	0	0	0	0	0.01713	0	0	0
k__Bacteria	p__Firmicutes	c__Clostridia	o__Clostridiales	f__Eubacteriaceae	g__Eubacterium	s__Eubacterium_hallii	t__GCF_000173975	0	0	0	0	0	0	0	0	0.17323	0	0	0
k__Bacteria	p__Firmicutes	c__Clostridia	o__Clostridiales	f__Eubacteriaceae	g__Eubacterium	s__Eubacterium_rectale	unclassified	0.18931	0	0	0	0	0	0	0	1.7887	0	1.07779	0.13172
k__Bacteria	p__Firmicutes	c__Clostridia	o__Clostridiales	f__Eubacteriaceae	g__Eubacterium	s__Eubacterium_ventriosum	t__GCF_000153885	0	0	0	0	0	0	0	0	0.13885	0	0	0
k__Bacteria	p__Firmicutes	c__Clostridia	o__Clostridiales	f__Lachnospiraceae	g__Anaerostipes	s__Anaerostipes_hadrus	t__GCF_000332875	0	0	0	0	0	0	0	0	0.02791	0	0	0
k__Bacteria	p__Firmicutes	c__Clostridia	o__Clostridiales	f__Lachnospiraceae	g__Blautia	s__Ruminococcus_gnavus	unclassified	0	0	0	0	0	0	0	0	0.09716	0	0	0
k__Bacteria	p__Firmicutes	c__Clostridia	o__Clostridiales	f__Lachnospiraceae	g__Blautia	s__Ruminococcus_obeum	unclassified	0	0	0	0	0	0	0	0	0.41328	0	0	0.01547
k__Bacteria	p__Firmicutes	c__Clostridia	o__Clostridiales	f__Lachnospiraceae	g__Blautia	s__Ruminococcus_torques	unclassified	0	1.2877	0	0	0	0	0	0	0.43564	0	1.03845	0
k__Bacteria	p__Firmicutes	c__Clostridia	o__Clostridiales	f__Lachnospiraceae	g__Coprococcus	s__Coprococcus_catus	t__GCF_000210555	0	0	0	0	0	0	0	0	0.01758	0	0	0
k__Bacteria	p__Firmicutes	c__Clostridia	o__Clostridiales	f__Lachnospiraceae	g__Coprococcus	s__Coprococcus_comes	t__GCF_000155875	0	0	0	0	0	0	0	0	0.13933	0	0	0
k__Bacteria	p__Firmicutes	c__Clostridia	o__Clostridiales	f__Lachnospiraceae	g__Dorea	s__Dorea_formicigenerans	unclassified	0	0	0	0	0	0	0	0	0.15352	0	0	0
k__Bacteria	p__Firmicutes	c__Clostridia	o__Clostridiales	f__Lachnospiraceae	g__Dorea	s__Dorea_longicatena	t__GCF_000154065	0	0	0	0	0	0	0	0	0.70996	0	0	0.03546
k__Bacteria	p__Firmicutes	c__Clostridia	o__Clostridiales	f__Lachnospiraceae	g__Dorea	unclassified	unclassified	0	0	0	0	0	0.14813	0	0	0	0	0.15227	0
k__Bacteria	p__Firmicutes	c__Clostridia	o__Clostridiales	f__Lachnospiraceae	g__Lachnospiraceae_noname	s__Lachnospiraceae_bacterium_5_1_63FAA	t__GCF_000185525	0	0	0	0	0	0	0	0	0.00996	0	0	0
k__Bacteria	p__Firmicutes	c__Clostridia	o__Clostridiales	f__Lachnospiraceae	g__Roseburia	s__Roseburia_intestinalis	unclassified	0	0	0	0	0	0	0	0	0.03196	0	0	0
k__Bacteria	p__Firmicutes	c__Clostridia	o__Clostridiales	f__Lachnospiraceae	g__Roseburia	s__Roseburia_inulinivorans	t__GCF_000174195	0	0	0	0	0	0	0	0	0.23366	0	0	0.00685
k__Bacteria	p__Firmicutes	c__Clostridia	o__Clostridiales	f__Peptostreptococcaceae	g__Peptostreptococcaceae_noname	s__Clostridium_bartlettii	t__GCF_000154445	0	0	0	0	0	0	0	0	0.10359	0	0	0
k__Bacteria	p__Firmicutes	c__Clostridia	o__Clostridiales	f__Peptostreptococcaceae	g__Peptostreptococcaceae_noname	unclassified	unclassified	0	0	0	0	0	0	0	0	0	0	0	0.09553
k__Bacteria	p__Firmicutes	c__Clostridia	o__Clostridiales	f__Ruminococcaceae	g__Faecalibacterium	s__Faecalibacterium_prausnitzii	unclassified	0.21938	0	0	0	0	0	0	0	0.80126	0	0.31843	0.06525
k__Bacteria	p__Firmicutes	c__Clostridia	o__Clostridiales	f__Ruminococcaceae	g__Ruminococcus	s__Ruminococcus_bromii	t__GCF_000209875	0	0	0	0	0	0	0	0	0.55049	0	0.23401	0.04467
k__Bacteria	p__Firmicutes	c__Clostridia	o__Clostridiales	f__Ruminococcaceae	g__Ruminococcus	s__Ruminococcus_lactaris	unclassified	0	0	0	0	0	0	0	0	0.21525	0	0	0
k__Bacteria	p__Firmicutes	c__Clostridia	o__Clostridiales	f__Ruminococcaceae	g__Subdoligranulum	unclassified	unclassified	0	0	0	0	0	0	0	0	0.37608	0	0.32017	0.04743
k__Bacteria	p__Firmicutes	c__Erysipelotrichia	o__Erysipelotrichales	f__Erysipelotrichaceae	g__Catenibacterium	s__Catenibacterium_mitsuokai	t__GCF_000173795	0	0	0	0	0	0	0	0	0.22126	0	0	0.00208
k__Bacteria	p__Firmicutes	c__Erysipelotrichia	o__Erysipelotrichales	f__Erysipelotrichaceae	g__Erysipelotrichaceae_noname	s__Eubacterium_biforme	t__GCF_000156655	0	0	0	0	0	0	0	0	0.27793	0	0	0
k__Bacteria	p__Firmicutes	c__Negativicutes	o__Selenomonadales	f__Veillonellaceae	g__Megamonas	unclassified	unclassified	0	0	0	0	0	0	0	0	0.02455	0	0	0
k__Bacteria	p__Planctomycetes	c__Planctomycetia	o__Planctomycetales	f__Planctomycetaceae	g__Singulisphaera	s__Singulisphaera_acidiphila	unclassified	0	0	0	0	0	0	0	0	0	0	0	0.00518
k__Bacteria	p__Proteobacteria	c__Alphaproteobacteria	o__Caulobacterales	f__Caulobacteraceae	g__Asticcacaulis	unclassified	unclassified	0	0	0	0	0	0	0	0	0.09282	1.59861	0	0
k__Bacteria	p__Proteobacteria	c__Alphaproteobacteria	o__Caulobacterales	f__Caulobacteraceae	g__Brevundimonas	unclassified	unclassified	0	0.85375	0	0.20076	0.85873	0	0	0.35631	0.06596	0.40661	1.01764	0.11387
k__Bacteria	p__Proteobacteria	c__Alphaproteobacteria	o__Caulobacterales	f__Caulobacteraceae	g__Caulobacter	unclassified	unclassified	0.40332	6.63731	11.0167	6.32977	6.56219	2.88958	6.01885	6.62125	1.7377	8.71198	3.4728	2.17672
k__Bacteria	p__Proteobacteria	c__Alphaproteobacteria	o__Caulobacterales	f__Caulobacteraceae	g__Caulobacter	s__Caulobacter_vibrioides	unclassified	0	0.84481	0.57934	0.41641	0.17572	0	0	0.14245	0.14609	3.69372	0.14088	0.07547
k__Bacteria	p__Proteobacteria	c__Alphaproteobacteria	o__Rhizobiales	f__Beijerinckiaceae	unclassified	unclassified	unclassified	0.88874	0	0	0	0.55217	0	0	0	0.04314	0	0	0
k__Bacteria	p__Proteobacteria	c__Alphaproteobacteria	o__Rhizobiales	f__Bradyrhizobiaceae	g__Afipia	unclassified	unclassified	0	1.47235	2.10515	0.16209	2.07331	5.33867	0.22265	2.48724	0.29853	0	0.27795	0.35789
k__Bacteria	p__Proteobacteria	c__Alphaproteobacteria	o__Rhizobiales	f__Bradyrhizobiaceae	g__Bradyrhizobium	s__Bradyrhizobium_japonicum	unclassified	0.2488	1.11412	1.00216	0.76988	1.99449	0.89895	1.52049	2.10663	0.08449	2.89168	2.03063	0.15107
k__Bacteria	p__Proteobacteria	c__Alphaproteobacteria	o__Rhizobiales	f__Bradyrhizobiaceae	g__Nitrobacter	s__Nitrobacter_hamburgensis	t__GCF_000013885	0	0	0	0	0	0	0	0	0.07074	0.52216	0	0.07514
k__Bacteria	p__Proteobacteria	c__Alphaproteobacteria	o__Rhizobiales	f__Bradyrhizobiaceae	g__Nitrobacter	unclassified	unclassified	0	0	0	0	0.04613	0	0	0	0.105	0.75562	0	0.24518
k__Bacteria	p__Proteobacteria	c__Alphaproteobacteria	o__Rhizobiales	f__Bradyrhizobiaceae	g__Rhodopseudomonas	s__Rhodopseudomonas_palustris	unclassified	14.4588	13.2096	16.2941	12.7692	28.8508	12.8524	7.07939	13.3983	1.8817	4.96826	13.8009	1.652
k__Bacteria	p__Proteobacteria	c__Alphaproteobacteria	o__Rhizobiales	f__Bradyrhizobiaceae	g__Rhodopseudomonas	unclassified	unclassified	7.30353	14.8196	9.00305	10.399	11.3022	10.1115	14.8129	0.78073	0.10969	0	1.26828	0
k__Bacteria	p__Proteobacteria	c__Alphaproteobacteria	o__Rhizobiales	f__Hyphomicrobiaceae	unclassified	unclassified	unclassified	1.47031	9.37736	1.46254	3.48658	4.07991	7.56177	0.50596	2.68853	0.18568	1.85796	0.11691	0.77761
k__Bacteria	p__Proteobacteria	c__Alphaproteobacteria	o__Rhizobiales	f__Hyphomicrobiaceae	g__Hyphomicrobium	s__Hyphomicrobium_denitrificans	unclassified	0	0	0	0	0	0	0	0	0	0.13234	0	0
k__Bacteria	p__Proteobacteria	c__Alphaproteobacteria	o__Rhizobiales	f__Hyphomicrobiaceae	g__Hyphomicrobium	unclassified	unclassified	0	1.22781	1.02287	1.50095	6.5871	1.9958	1.54934	0.85224	0.10135	2.33506	0.73834	0.17267
k__Bacteria	p__Proteobacteria	c__Alphaproteobacteria	o__Rhizobiales	f__Phyllobacteriaceae	g__Mesorhizobium	s__Mesorhizobium_ciceri	t__GCF_000185905	0	0	0	0	0	0	0	0	0	0	0	0.01014
k__Bacteria	p__Proteobacteria	c__Alphaproteobacteria	o__Rhizobiales	f__Phyllobacteriaceae	g__Mesorhizobium	s__Mesorhizobium_loti	unclassified	2.17385	1.70782	2.07729	1.30494	2.3143	0.59684	0.55311	0.71019	1.42481	3.72742	1.55839	1.47735
k__Bacteria	p__Proteobacteria	c__Alphaproteobacteria	o__Rhizobiales	f__Phyllobacteriaceae	g__Mesorhizobium	unclassified	unclassified	3.10248	2.14014	2.85082	2.76858	3.52535	1.95228	2.1788	2.71455	1.58032	6.56991	4.77174	1.95065
k__Bacteria	p__Proteobacteria	c__Alphaproteobacteria	o__Rhizobiales	f__Rhizobiaceae	g__Agrobacterium	unclassified	unclassified	0	0	0	0	0	0	0	0	0	0	0	0.00486
k__Bacteria	p__Proteobacteria	c__Alphaproteobacteria	o__Rhizobiales	f__Rhizobiaceae	g__Rhizobium	s__Rhizobium_freirei	t__GCF_000359745	0	0	0	0	0	0	0	0	0.04749	0	0	0
k__Bacteria	p__Proteobacteria	c__Alphaproteobacteria	o__Rhizobiales	f__Rhodobiaceae	unclassified	unclassified	unclassified	0	0	0	0	0	0	0	0	0	0	0	0.07538
k__Bacteria	p__Proteobacteria	c__Alphaproteobacteria	o__Rhodospirillales	f__Rhodospirillales_noname	g__Rhodospirillales_noname	s__Reyranella_massiliensis	t__GCF_000312425	0	0	0	0.17503	0.12336	0.03175	0.05467	0	0	0.34532	0	0
k__Bacteria	p__Proteobacteria	c__Alphaproteobacteria	o__Sphingomonadales	f__Sphingomonadaceae	g__Sphingobium	unclassified	unclassified	0.44883	1.52745	0.76545	6.92172	1.20788	0.68972	0	0.26151	0.12978	0.83391	0.46653	0.10327
k__Bacteria	p__Proteobacteria	c__Alphaproteobacteria	o__Sphingomonadales	f__Sphingomonadaceae	g__Sphingopyxis	unclassified	unclassified	0	0	0	0	0	0	0	0	0	1.33643	0.43923	0.14858
k__Bacteria	p__Proteobacteria	c__Betaproteobacteria	o__Burkholderiales	f__Alcaligenaceae	g__Pusillimonas	unclassified	unclassified	0	0	0	0	0	0	0	0	0.04269	0	0	0.03769
k__Bacteria	p__Proteobacteria	c__Betaproteobacteria	o__Burkholderiales	f__Burkholderiaceae	g__Burkholderia	s__Burkholderia_bryophila	t__GCF_000383275	0	0	0	0	0	0	0	0	0.00349	0	0	0.27096
k__Bacteria	p__Proteobacteria	c__Betaproteobacteria	o__Burkholderiales	f__Burkholderiaceae	g__Burkholderia	s__Burkholderia_graminis	t__GCF_000172415	0	0	0	0	0	0	0	0	0	0	0	0.00451
k__Bacteria	p__Proteobacteria	c__Betaproteobacteria	o__Burkholderiales	f__Burkholderiaceae	g__Burkholderia	unclassified	unclassified	12.7004	3.33115	6.50569	4.69984	0	8.75609	1.07597	6.9511	2.58849	7.76354	18.8046	5.29632
k__Bacteria	p__Proteobacteria	c__Betaproteobacteria	o__Burkholderiales	f__Burkholderiaceae	g__Cupriavidus	s__Cupriavidus_basilensis	unclassified	0.67924	0	0.63979	0	0	0	0	0	0	0	0	0.67057
k__Bacteria	p__Proteobacteria	c__Betaproteobacteria	o__Burkholderiales	f__Burkholderiaceae	g__Cupriavidus	unclassified	unclassified	2.31524	0	0	0	0.60107	0	0	0	0.04339	0	0.48389	0.34563
k__Bacteria	p__Proteobacteria	c__Betaproteobacteria	o__Burkholderiales	f__Burkholderiaceae	g__Ralstonia	unclassified	unclassified	0	0	0	0	0	0	0	1.25865	0	0	0	0
k__Bacteria	p__Proteobacteria	c__Betaproteobacteria	o__Burkholderiales	f__Burkholderiales_noname	g__Thiomonas	unclassified	unclassified	2.7176	0	0	1.84371	0	5.88848	0.84419	2.18149	0.08842	1.52279	1.05384	0.23419
k__Bacteria	p__Proteobacteria	c__Betaproteobacteria	o__Burkholderiales	f__Comamonadaceae	g__Comamonas	unclassified	unclassified	0	0	0.37636	0	0	0	0	0	0	0	0	0.05756
k__Bacteria	p__Proteobacteria	c__Betaproteobacteria	o__Burkholderiales	f__Comamonadaceae	g__Delftia	unclassified	unclassified	0	0	0	0	0	0	0	0	0.00281	0	0	0
k__Bacteria	p__Proteobacteria	c__Betaproteobacteria	o__Burkholderiales	f__Comamonadaceae	g__Limnohabitans	unclassified	unclassified	0.17008	0	0	0	0	0	0	0	0	0	0	0.00532
k__Bacteria	p__Proteobacteria	c__Betaproteobacteria	o__Burkholderiales	f__Comamonadaceae	g__Polaromonas	unclassified	unclassified	24.7933	2.63774	4.46667	3.33206	2.17863	2.31223	0.15754	0	0.08114	0.71345	0.5769	0.28214
k__Bacteria	p__Proteobacteria	c__Betaproteobacteria	o__Burkholderiales	f__Comamonadaceae	g__Variovorax	s__Variovorax_paradoxus	unclassified	0	0	0	0	0	0	0	0	0	4.70988	0	0
k__Bacteria	p__Proteobacteria	c__Betaproteobacteria	o__Burkholderiales	f__Comamonadaceae	g__Variovorax	unclassified	unclassified	3.13109	5.0136	4.29178	6.27988	3.7923	1.97212	2.47158	1.44026	0.50841	4.31346	4.01177	0.7324
k__Bacteria	p__Proteobacteria	c__Betaproteobacteria	o__Burkholderiales	f__Oxalobacteraceae	g__Collimonas	s__Collimonas_fungivorans	t__GCF_000221045	0	0	0	0	0	0	0	0	0	0	0	0.04533
k__Bacteria	p__Proteobacteria	c__Betaproteobacteria	o__Burkholderiales	f__Oxalobacteraceae	g__Herbaspirillum	unclassified	unclassified	0	0	0	0	0	0	0	0	0.02522	0	0	0.04965
k__Bacteria	p__Proteobacteria	c__Betaproteobacteria	o__Burkholderiales	f__Oxalobacteraceae	g__Janthinobacterium	unclassified	unclassified	0.64879	0.31676	0	0.57829	0	0.96426	0.20438	0	0.1383	0	0.25011	0.88076
k__Bacteria	p__Proteobacteria	c__Betaproteobacteria	o__Burkholderiales	f__Oxalobacteraceae	g__Massilia	unclassified	unclassified	1.23164	2.16843	2.57698	1.40973	1.20082	1.57176	1.70176	1.23927	0.52521	0.49746	0.80281	3.42285
k__Bacteria	p__Proteobacteria	c__Betaproteobacteria	o__Hydrogenophilales	f__Hydrogenophilaceae	unclassified	unclassified	unclassified	0	0	0	0	0	0	0	0	0.0059	0	0	0.0679
k__Bacteria	p__Proteobacteria	c__Betaproteobacteria	o__Hydrogenophilales	f__Hydrogenophilaceae	g__Thiobacillus	s__Thiobacillus_denitrificans	unclassified	0	0	0	0	0	0	0	0	0	0.15868	0	0
k__Bacteria	p__Proteobacteria	c__Betaproteobacteria	o__Hydrogenophilales	f__Hydrogenophilaceae	g__Thiobacillus	s__Thiobacillus_thioparus	t__GCF_000373385	0	0	0	0	0	0	0	0	0	0	0	0.06443
k__Bacteria	p__Proteobacteria	c__Betaproteobacteria	o__Methylophilales	f__Methylophilaceae	g__Methylotenera	unclassified	unclassified	0	0	0	0	2.31134	0	0	0	0.29105	0	0	0.67998
k__Bacteria	p__Proteobacteria	c__Betaproteobacteria	o__Methylophilales	f__Methylophilaceae	g__Methylotenera	s__Methylotenera_versatilis	unclassified	0	0	0	0	0	0	0	0	0.02174	0	0	0.02034
k__Bacteria	p__Proteobacteria	c__Betaproteobacteria	o__Neisseriales	f__Neisseriaceae	g__Pseudogulbenkiania	unclassified	unclassified	0	0	0	0	0	0	0	0	0	0	0.47212	0
k__Bacteria	p__Proteobacteria	c__Betaproteobacteria	o__Nitrosomonadales	f__Nitrosomonadaceae	g__Nitrosospira	s__Nitrosospira_multiformis	t__GCF_000196355	0	0	0	0	0	0	1.94837	1.27379	0	1.70978	0.89231	0
k__Bacteria	p__Proteobacteria	c__Betaproteobacteria	o__Nitrosomonadales	f__Nitrosomonadaceae	g__Nitrosospira	unclassified	unclassified	0.2466	0.52899	0.87391	1.19314	1.2162	1.71376	0	0.51331	0.93408	8.05387	0.92287	0.81521
k__Bacteria	p__Proteobacteria	c__Gammaproteobacteria	o__Chromatiales	f__Ectothiorhodospiraceae	g__Spiribacter	unclassified	unclassified	0	0	0	0.58841	0	0	0	0	0	0	0	0
k__Bacteria	p__Proteobacteria	c__Gammaproteobacteria	o__Enterobacteriales	f__Enterobacteriaceae	g__Citrobacter	s__Citrobacter_koseri	t__GCF_000018045	0	0	0	0	0	0	0	0	0.0123	0	0	0
k__Bacteria	p__Proteobacteria	c__Gammaproteobacteria	o__Enterobacteriales	f__Enterobacteriaceae	g__Enterobacter	s__Enterobacter_cloacae	unclassified	0	0	0	0	0	0	0	0	0.08214	0	0	0
k__Bacteria	p__Proteobacteria	c__Gammaproteobacteria	o__Enterobacteriales	f__Enterobacteriaceae	g__Escherichia	s__Escherichia_coli	unclassified	0	0	0	0	0	0	0	0	0.04353	0	0	0
k__Bacteria	p__Proteobacteria	c__Gammaproteobacteria	o__Enterobacteriales	f__Enterobacteriaceae	g__Escherichia	unclassified	unclassified	0.72815	0	0	0	0	0	0	0.43838	0	0	1.27064	0
k__Bacteria	p__Proteobacteria	c__Gammaproteobacteria	o__Enterobacteriales	f__Enterobacteriaceae	g__Serratia	s__Serratia_liquefaciens	t__GCF_000422085	0	0	0	0	0	0	0	0	0.17788	0	0	0
k__Bacteria	p__Proteobacteria	c__Gammaproteobacteria	o__Legionellales	f__Legionellaceae	unclassified	unclassified	unclassified	0	0	0	1.32188	0	0	0	0	0	0	0	0.04184
k__Bacteria	p__Proteobacteria	c__Gammaproteobacteria	o__Oceanospirillales	f__Halomonadaceae	g__Halomonas	unclassified	unclassified	1.28036	0	0	0	0	0	1.19319	0	0	0	1.48951	0
k__Bacteria	p__Proteobacteria	c__Gammaproteobacteria	o__Pseudomonadales	f__Pseudomonadaceae	g__Pseudomonas	s__Pseudomonas_mandelii	unclassified	0	0.27983	0	0.91713	0	0	0	0	0	0	0	0.01841
k__Bacteria	p__Proteobacteria	c__Gammaproteobacteria	o__Pseudomonadales	f__Pseudomonadaceae	g__Pseudomonas	unclassified	unclassified	5.23103	0	1.47376	7.95513	0	0	0	0	0	3.29757	0	0.20699
k__Bacteria	p__Proteobacteria	c__Gammaproteobacteria	o__Xanthomonadales	f__Sinobacteraceae	unclassified	unclassified	unclassified	0	0.81684	0	0	0	0	0.52769	0	0.16581	0	0	0
k__Bacteria	p__Proteobacteria	c__Gammaproteobacteria	o__Xanthomonadales	f__Xanthomonadaceae	g__Pseudoxanthomonas	unclassified	unclassified	0	0	0	0	0	0	0	0	0	0.02456	0	0.0393
k__Bacteria	p__Proteobacteria	c__Gammaproteobacteria	o__Xanthomonadales	f__Xanthomonadaceae	g__Rhodanobacter	s__Rhodanobacter_thiooxydans	t__GCF_000264375	0	0	0	0	0	0	0	0	0.15136	0	0	0.17063
k__Bacteria	p__Proteobacteria	c__Gammaproteobacteria	o__Xanthomonadales	f__Xanthomonadaceae	g__Rhodanobacter	unclassified	unclassified	1.6756	7.89256	3.79039	0.51922	1.78689	3.43985	1.2578	2.16455	3.15753	4.84476	1.42076	2.92996
k__Bacteria	p__Proteobacteria	c__Gammaproteobacteria	o__Xanthomonadales	f__Xanthomonadaceae	g__Rudaea	s__Rudaea_cellulosilytica	t__GCF_000378125	0	0	0	0	0	0	0	0.33467	0	0	0.17613	0
k__Bacteria	p__Proteobacteria	c__Gammaproteobacteria	o__Xanthomonadales	f__Xanthomonadaceae	g__Stenotrophomonas	s__Stenotrophomonas_maltophilia	unclassified	0	0	0	0	0	0	0	0	0.11321	0	0	0
k__Bacteria	p__Proteobacteria	c__Gammaproteobacteria	o__Xanthomonadales	f__Xanthomonadaceae	g__Stenotrophomonas	unclassified	unclassified	0	0	0	0	0	0	0	0	0.05147	0	0	0
k__Bacteria	p__Verrucomicrobia	c__Verrucomicrobiae	o__Verrucomicrobiales	f__Verrucomicrobia_subdivision_3	g__Pedosphaera	s__Pedosphaera_parvula	t__GCF_000172555	0	0	0	0	0	0	0	0	0.00786	0.05204	0	0
k__Eukaryota	p__Ascomycota	c__Eurotiomycetes	o__Eurotiales	f__Aspergillaceae	unclassified	unclassified	unclassified	0	0	0	0	0	0	0.39159	0	0	0	0	0
k__Eukaryota	p__Ascomycota	c__Sordariomycetes	o__Sordariales	f__Chaetomiaceae	unclassified	unclassified	unclassified	0	0	0	0	0	0	0	0.01524	0.01442	0	0	0.04061
k__Eukaryota	p__Ascomycota	c__Sordariomycetes	o__Sordariales	f__Chaetomiaceae	g__Chaetomium	s__Chaetomium_globosum	t__GCA_000143365	0	0	0	0	0	0	0	0	0	0	0	0.25533
k__Eukaryota	p__Ascomycota	c__Sordariomycetes	o__Sordariales	f__Sordariaceae	unclassified	unclassified	unclassified	0	0	0	0	0	0	0	0	0	0	0	0.01241
